# Supplementary material for: Invited perspectives: Views of 350 natural hazard community members on key challenges in natural hazards research and the Sustainable Development Goals
Source: Copernicus journal article supplement (doi:10.5194/nhess-22-2771-2022), 2022-08-24
Supplement: Supplementary file 1 [file nhess-22-2771-2022-supplement.zip]

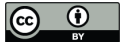

*Supplement of*

**Invited perspectives: Views of 350 natural hazard community members on key challenges in natural hazards research and the Sustainable Development Goals**

**Robert Šakić Trogrlić et al.**

*Correspondence to:* Bruce D. Malamud ([bruce.malamud@kcl.ac.uk](mailto:bruce.malamud@kcl.ac.uk))

- [nhess-22-2771-2022-supplement-title-page.pdf](#)
- [SakicTrogrlic\\_Donovan\\_Malamud\\_SupplementaryMaterial\\_NHESS\\_2022\\_23Aug2022.xlsx](#)

The copyright of individual parts of the supplement might differ from the article licence.
